# Supplementary material
Source: ML conference proceedings conference paper supplement (https://openreview.net/forum?id=BzMxEdIsqeq)
Supplement: supplementary_material [file attachment]

# Latent-Variable Model

$$p(y) = \int p(x, y) dx$$

**Posterior**  $p(x | y)$

**Posterior Approximation**

$$\mathcal{S}.q(x) = \int \mathcal{S}.q(r, x) dr$$

**Meta-Posterior**  $\mathcal{S}.q(r | x)$

$\mathcal{S}$

**Meta-Posterior Approximation**

$$\mathcal{S}.\mathcal{M}(x).q(r) = \int \mathcal{S}.\mathcal{M}(x).q(s, r) ds$$

$\mathcal{S}.\mathcal{M}$

**Meta-Meta-Posterior**  $\mathcal{S}.\mathcal{M}(x).q(s | r)$

**Meta-Meta-Posterior Approximation**

$$\mathcal{S}.\mathcal{M}(x).\mathcal{M}(r).q(s)$$

$\mathcal{S}.\mathcal{M}.\mathcal{M}$

$\vdots$
