# Supplementary material
Source: ML conference proceedings conference paper supplement (https://openreview.net/forum?id=BzMxEdIsqeq)

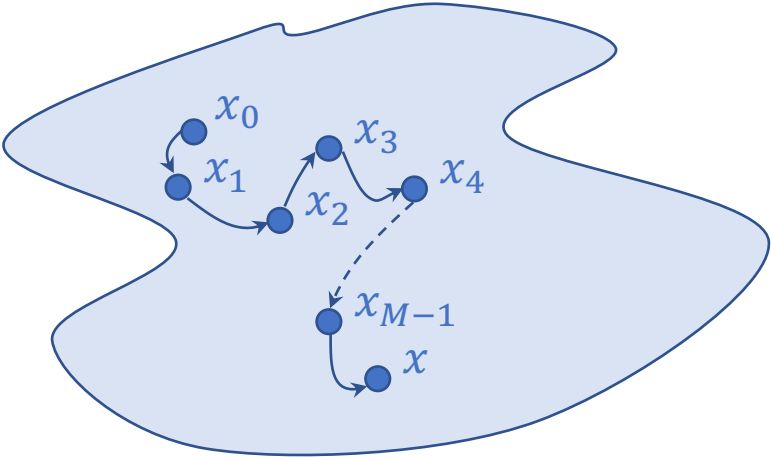

Supplement: supplementary_material [file attachment]

# Multimodal target

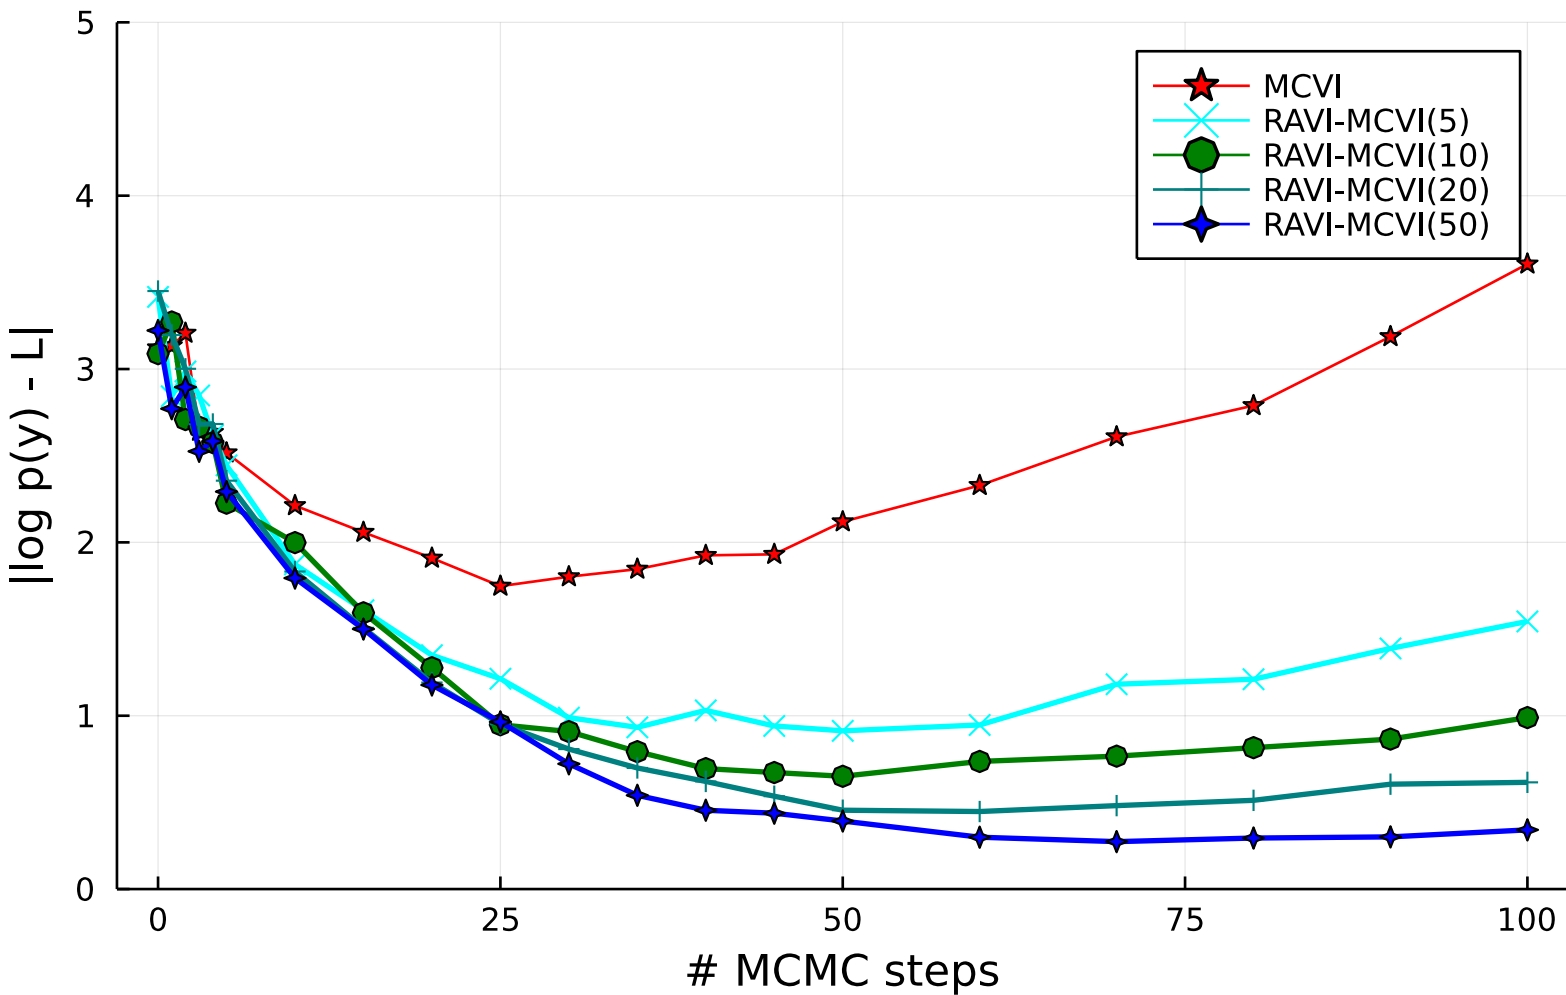

Supplement: supplementary_material [file attachment]

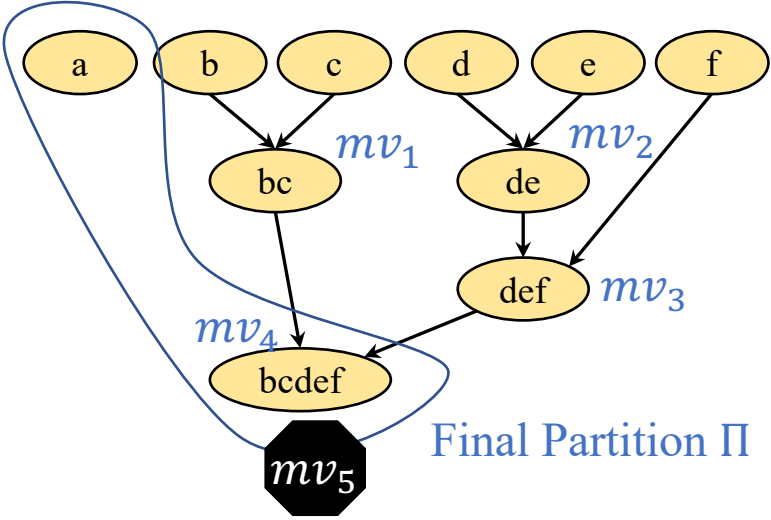

Supplement: supplementary_material [file attachment]

# Unimodal target

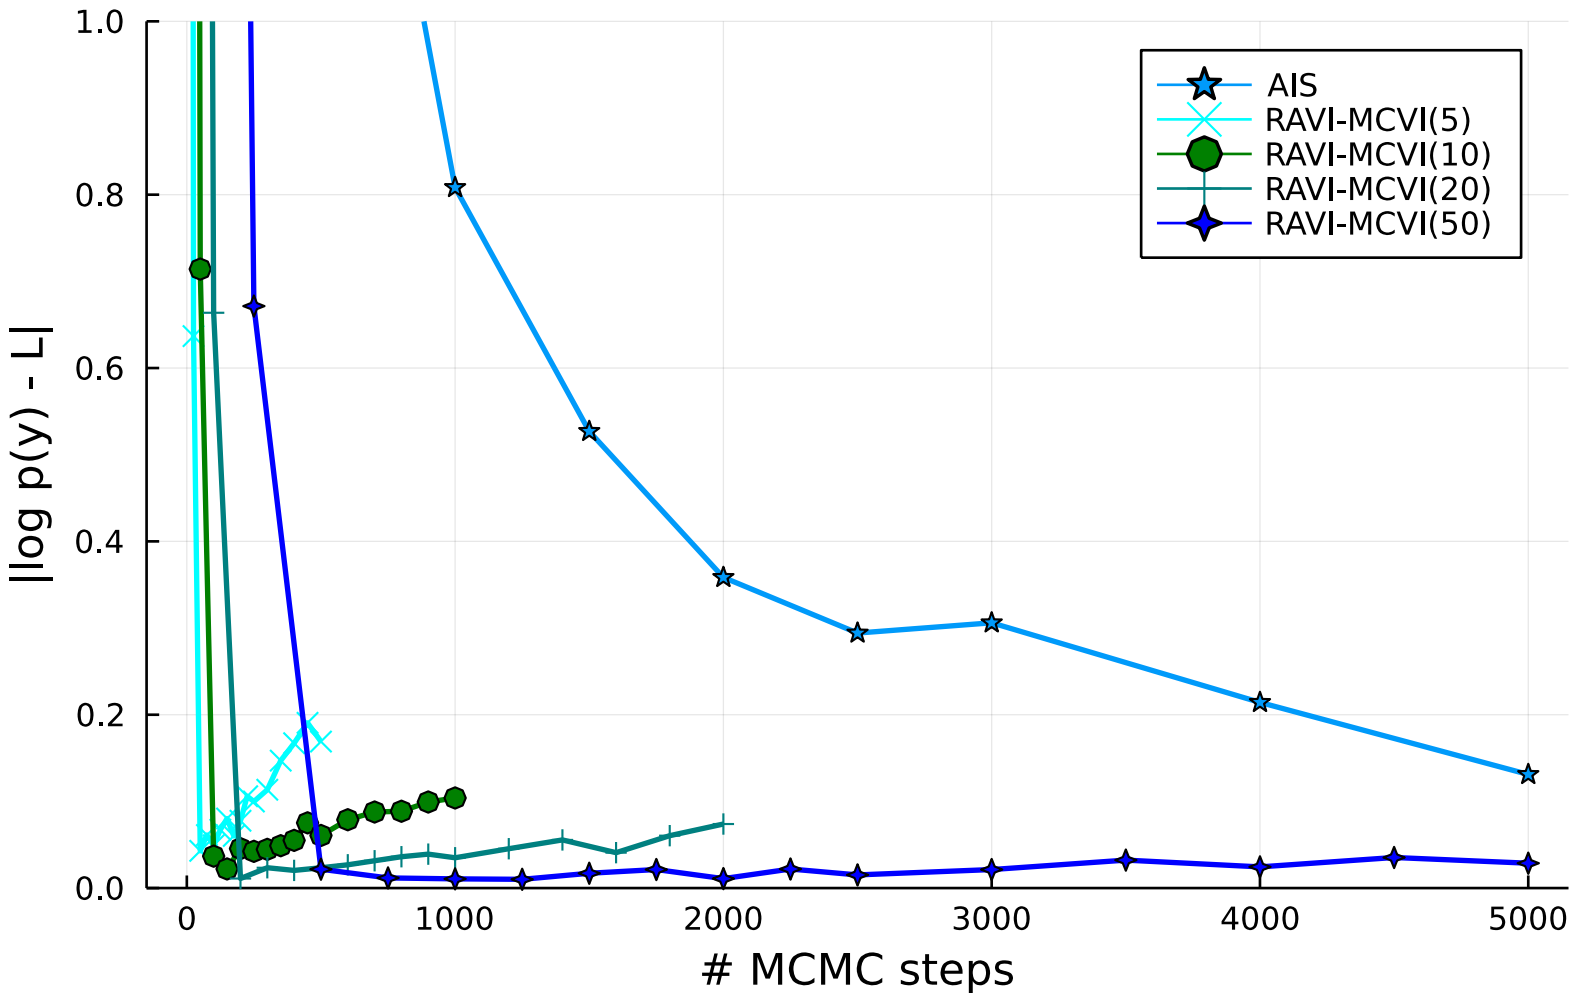

Supplement: supplementary_material [file attachment]

# Unimodal target

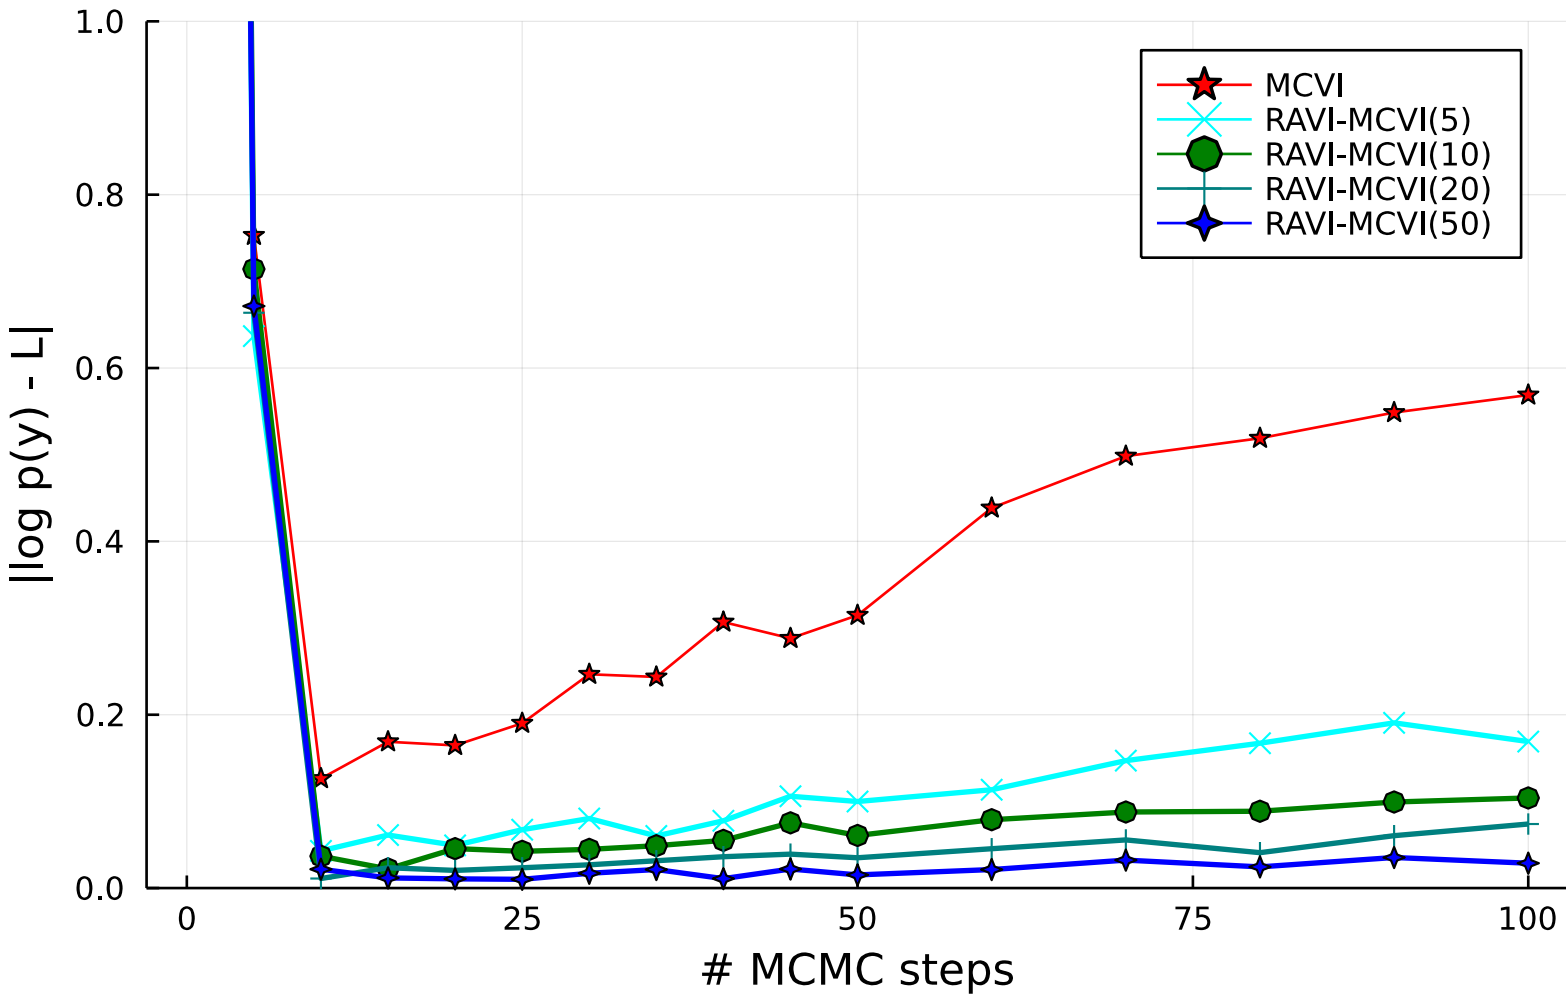

Supplement: supplementary_material [file attachment]
